# Supplementary material for: Comparison of Oral Collection Methods for Studies of Microbiota
Source: Oxford University Press journal article supplement (doi:10.1158/1055-9965.epi-18-0312), 2018-09-27
Supplement: 10559965epi180312-sup-198947_2_supp_4937850_pc7phh.docx [file 10559965epi180312-sup-198947_2_supp_4937850_pc7phh.docx]

SUPPLEMENTAL FIGURE 1. Stability of Scope mouthwash samples incubated at ambient temperature for four days (Day 4) compared to samples frozen immediately (Day 0) for the relative abundance of the top 25 genera using intraclass correlation coefficients for Mayo and Bangladesh samples.

A

SUPPLEMENTAL FIGURE 2. Differential abundance analysis of phylum (red text), family (blue text), and genus (purple text) level changes (significant at FDR < 0.01) after incubation at ambient temperature for four days (Day 4) compared to samples frozen immediately (Day 0) for Mayo Clinic (2A) and Bangladesh (2B) samples.

BA

B

A

SUPPLEMENTAL FIGURE 3. Comparability of Scope mouthwash to OMNIgene ORAL kit samples for the relative abundance of the top 25 genera using intraclass correlation coefficients (3A) and Spearman correlations (3B) for Mayo Clinic and Bangladesh samples.

A

B

SUPPLEMENTAL FIGURE 4. Differential abundance analysis of phylum (red text), family (blue text), and genus (purple text) level changes (significant at FDR < 0.01) comparing the OMNIgene ORAL kit to the Scope mouthwash samples for Mayo Clinic (4A) and Bangladesh (4B) samples.
